# Supplementary material for: Multi-responsive γ-methylene-γ-butyrolactone/N-vinyl caprolactam copolymers involving pH-dependent reversible lactonization
Source: Royal Society of Chemistry journal article supplement (doi:10.1039/d2py00713d), 2022-01-01
Supplement: d2py00713d1.pdf [file d2py00713d1.pdf]

## Supporting Information

### Multi-responsive $\gamma$ -Methylene- $\gamma$ -Butyrolactone/*N*-Vinyl Caprolactam Copolymers Involving pH-depend Reversible Lactonization

Zhuoqun Wang<sup>a</sup> and Antoine Debuigne <sup>\*a</sup>

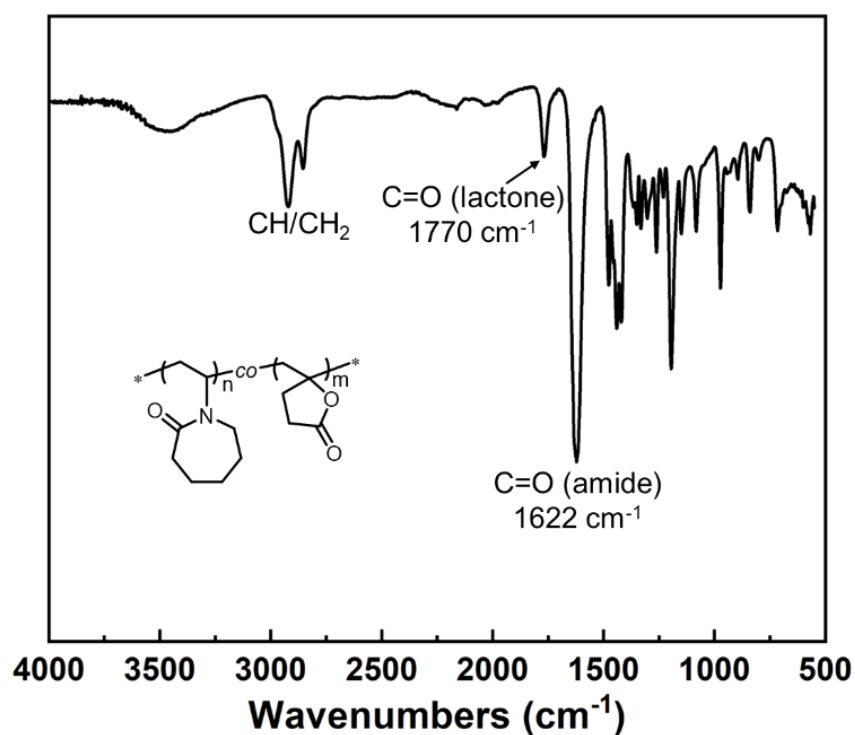

**Figure S1.** FT-IR spectrum of P(NVCL-co- $\gamma$ M $\gamma$ BL) ( $M_n = 20000$  g/mol,  $F_{\gamma M \gamma BL} = 0.05$ ) prepared by conventional radical polymerization (Table 1, entry 1).

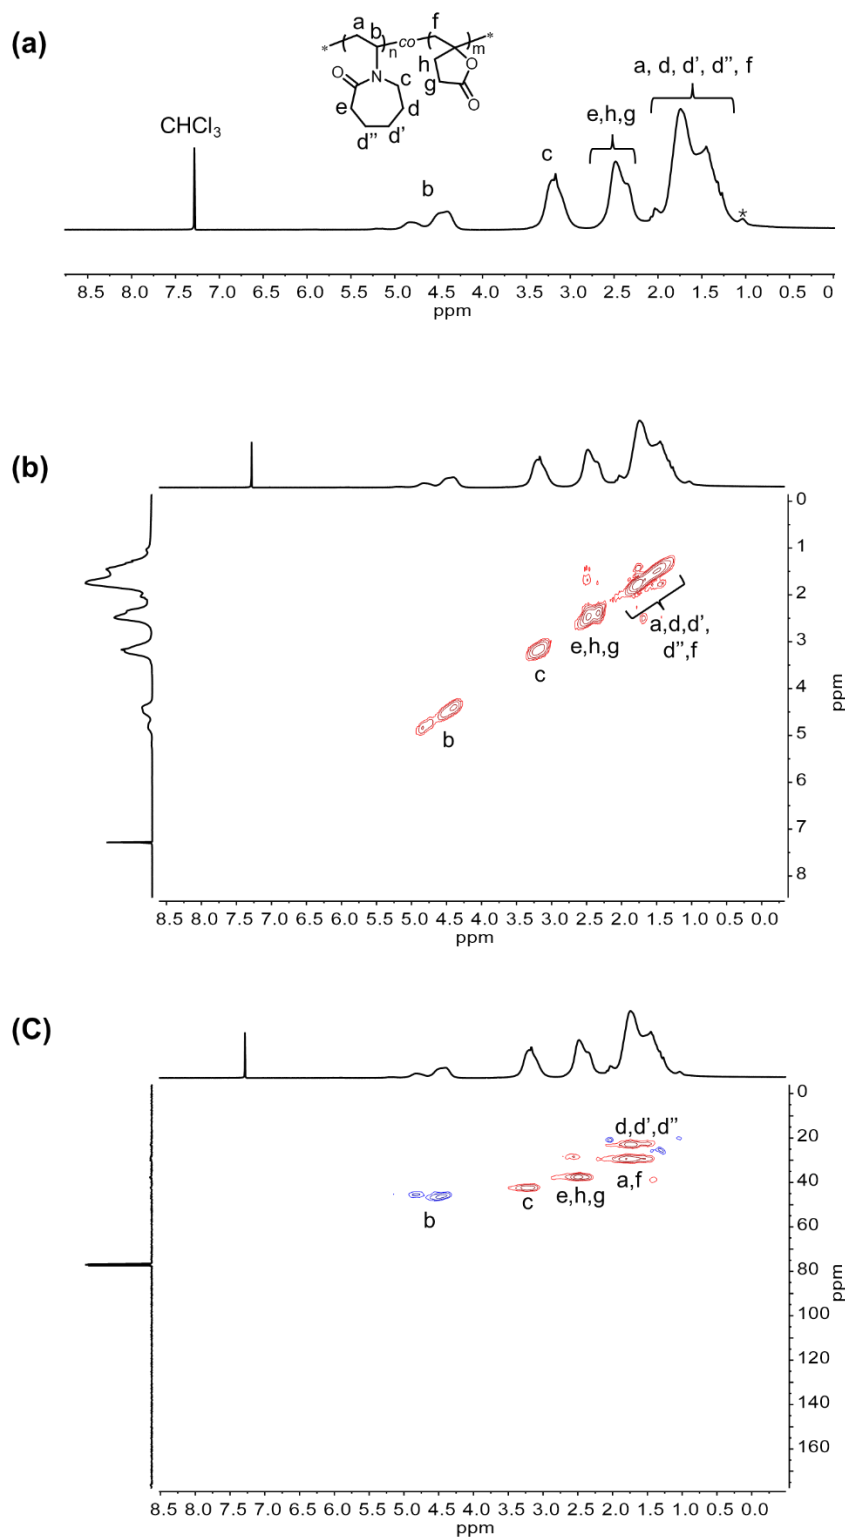

**Figure S2.**(a)  $^1\text{H}$  NMR, (b) COSY and (c) HSQC of P(NVCL-*co*- $\gamma\text{M}\gamma\text{BL}$ ) ( $M_n = 11500$  g/mol,  $F_{\gamma\text{M}\gamma\text{BL}} = 0.1$ ) prepared by OMRP (Table 2, entry 4). \* $^1\text{H}$  signal of the methyl groups of the initiating fragment R (R =  $-\text{C}(\text{CN})(\text{CH}_3)-\text{CH}_2-\text{C}(\text{CH}_3)_2\text{OCH}_3$ ).

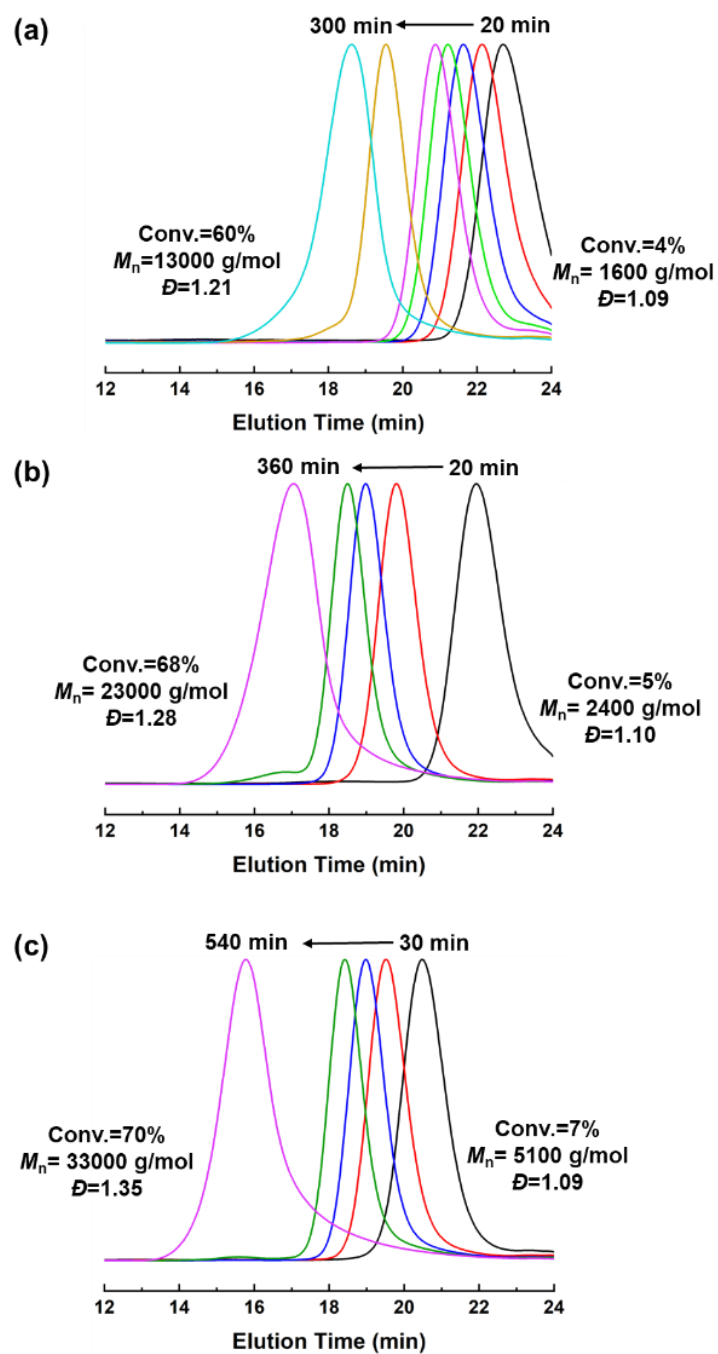

**Figure S3.** Overlay of SEC traces for the OMRP of NVCl and  $\gamma M \gamma BL$  with different monomers/RCo molar ratios: (a)  $[\text{monomers}]_0/[\text{R-Co(acac)}_2]_0=250/1$ , (b)  $[\text{monomers}]_0/[\text{R-Co(acac)}_2]_0=500/1$ , (c)  $[\text{monomers}]_0/[\text{R-Co(acac)}_2]_0=750/1$ . ( $f^\circ_{\gamma M \gamma BL} = 0.1$ , Table 2 entries 1-3).

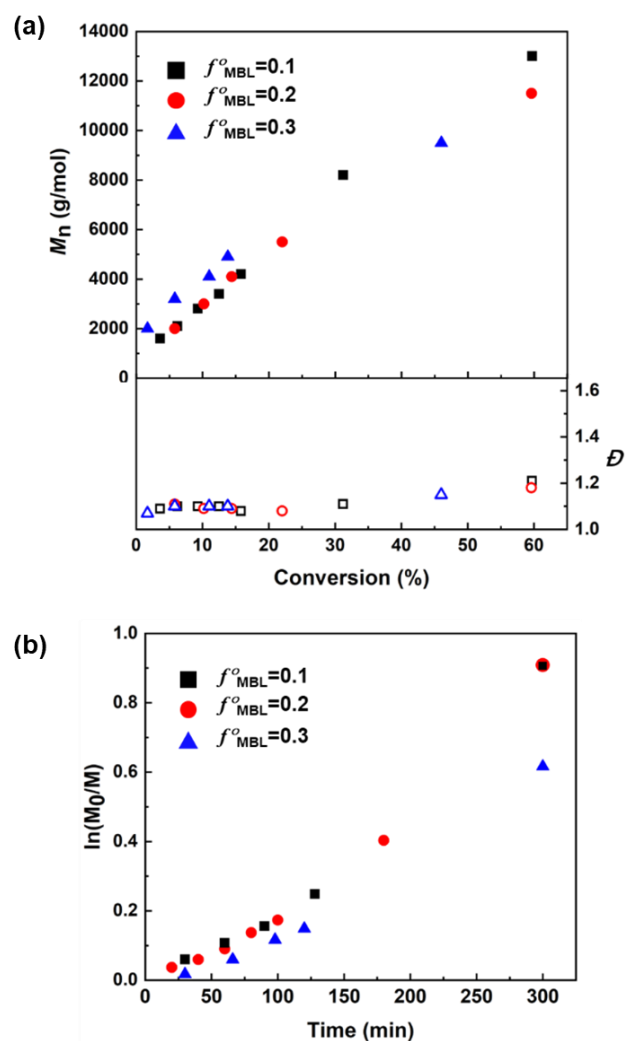

**Figure S4.** (a) Dependence of  $M_n$  (full symbols) and  $\mathcal{D}$  (hollow symbols) on the total monomers conversion and (b) time dependence of  $\ln(M_0/M)$  for the OMRP of NVCL/γMγBL with different feed ratio:  $\blacksquare$   $[\text{NVCL}]_0/[\gamma\text{M}\gamma\text{BL}]_0=0.9/0.1$ ,  $\bullet$   $[\text{NVCL}]_0/[\gamma\text{M}\gamma\text{BL}]_0=0.8/0.2$ ,  $\blacktriangle$   $[\text{NVCL}]_0/[\gamma\text{M}\gamma\text{BL}]_0=0.7/0.3$  ( $[\text{comonomers}]_0/[\text{R-Co}(\text{acac})_2]_0=250/1$ , Table 2 entries 1, 4 and 5).

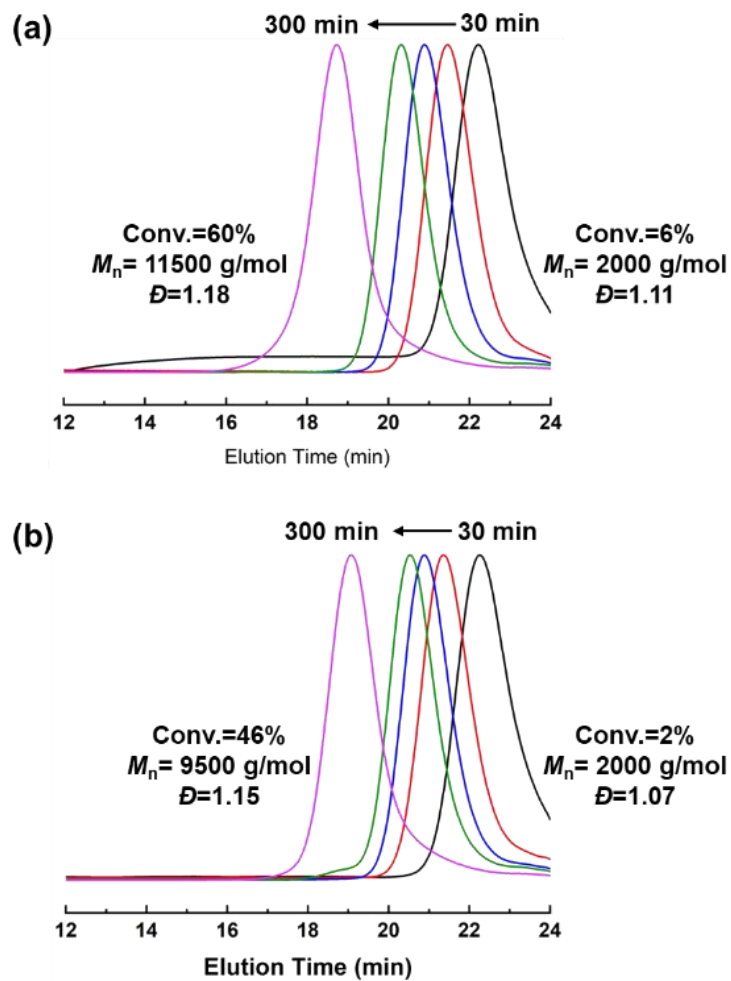

**Figure S5.** Overlay of SEC traces for the OMRP of NVCl and  $\gamma M \gamma BL$  with different feed compositions: a)  $[NVCl]_0/[ \gamma M \gamma BL ]_0 = 0.8/0.2$ , b)  $[NVCl]_0/[ \gamma M \gamma BL ]_0/[R-Co(acac)_2]_0 = 0.7/0.3$ . ( $[comonomers]_0/[R-Co(acac)_2]_0 = 250/1$ , Table 2 entries 4 and 5).

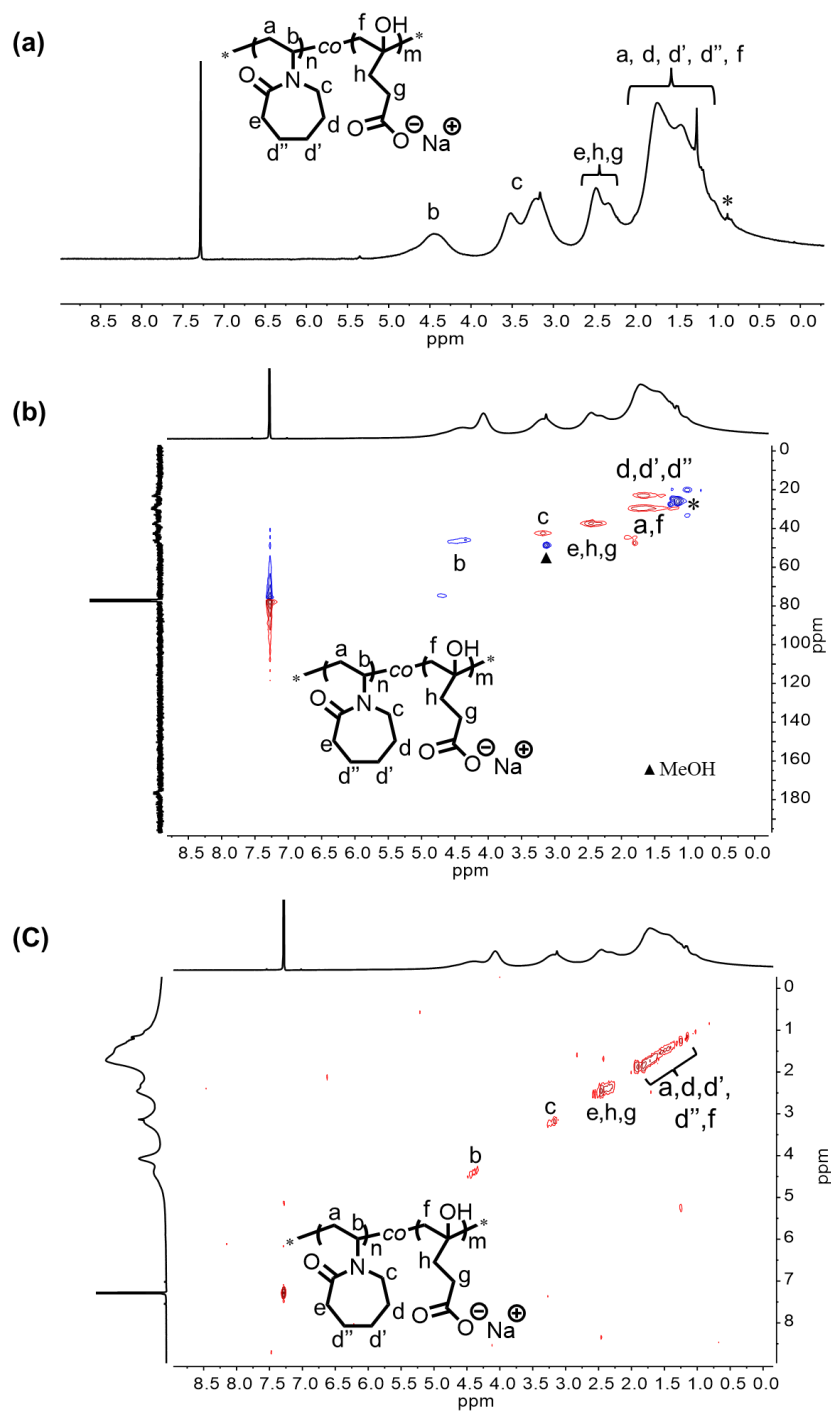

**Figure S6.** (a)  $^1\text{H}$  NMR, (b) HSQC and (c) COSY of P(NVCL-co-HPEA) (Precursor: P(NVCL-co- $\gamma$ M $\beta$ BL) ( $M_n = 11500$  g/mol,  $F_{\gamma\text{M}\beta\text{BL}} = 0.1$ ) prepared by OMRP (Table 2, entry 4).  $^*^1\text{H}$  signal of the methyl groups of the R initiating fragment (R=  $-\text{C}(\text{CN})(\text{CH}_3)-\text{CH}_2-\text{C}(\text{CH}_3)_2\text{OCH}_3$ ).

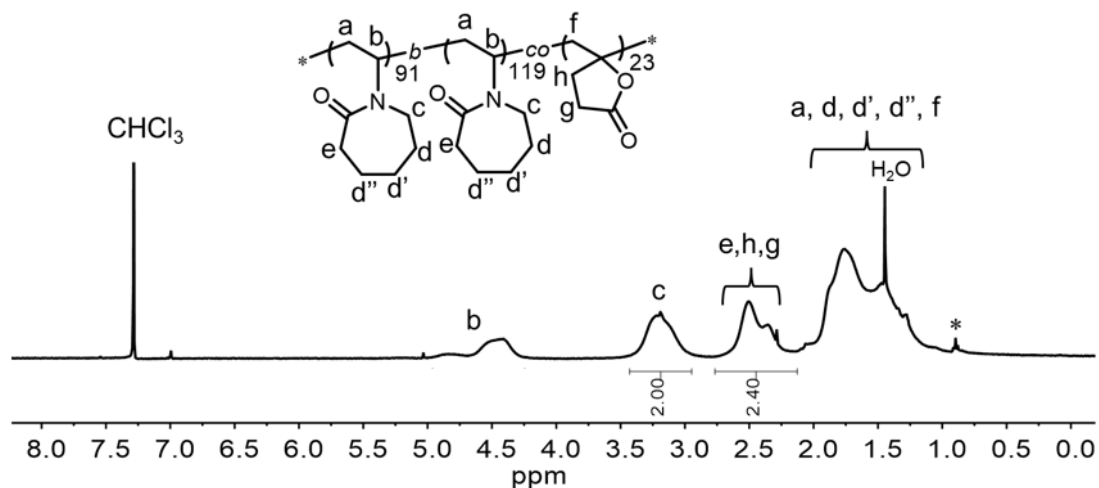

**Figure S7.** <sup>1</sup>H NMR spectrum of P(NVCL)<sub>91</sub>-b-P(NVCL)<sub>119</sub>-co-γMγBL<sub>23</sub>. \*<sup>1</sup>H signal of the methyl groups of the R initiating fragment (R= -C(CN)(CH<sub>3</sub>)-CH<sub>2</sub>-C(CH<sub>3</sub>)<sub>2</sub>OCH<sub>3</sub>).

**Table S1.** Surface zeta potential of P(NVCL)<sub>91</sub>-b-(NVCL)<sub>119</sub>-co-HPEA<sub>23</sub> particles in aqueous solution (5mg/mL) at different temperatures.

| Temperature (°C)    | 65     | 70     | 80     |
|---------------------|--------|--------|--------|
| Zeta potential (mV) | -41.04 | -51.85 | -55.25 |
